# Supplementary material for: Reliability of the DIERS Formetric 4D Spine Shape Parameters in Adults without Postural Deformities
Source: Hindawi journal article supplement (doi:10.1155/2020/1796247), 2020-01-01
Supplement: f1 [file 1796247.f1.pdf]

## Supplementary Materials

**Supplementary Materials 1.** Additional description of the equations used for the statistical analysis

For each spine shape parameter, a nested random effects model (model 1) was built from data for all participants for all 5 days, using the initial 6 scans from each day and each of the 12 images within a scan as previously recommended [15]. Variance estimates were calculated as follows:

$$\sigma^2 = \sigma_{participants}^2 + \sigma_{days}^2 + \sigma_{scans}^2 + \sigma_{residual}^2 \quad (1)$$

where  $\sigma_{participants}^2$  was between-participants variance,  $\sigma_{days}^2$  was between-days variance,  $\sigma_{scans}^2$  was between-stationary scans variance, and  $\sigma_{residual}^2$  was residual variance from images. Between-scan ICC (ICC-SBS) was calculated for stationary scans done on the same day.

For each spine shape parameter, another nested random effects model (model 2) was built using data from the 6 scans when participants were repositioned between scans and included all 13 images recorded within a scan. Total observed variance was calculated as follows:

$$\sigma_{total}^2 = \sigma_{participants}^2 + \sigma_{scans}^2 + \sigma_{residual}^2 \quad (2)$$

The ICC for between scans with repositioning (ICC-R) was calculated from this model. To estimate between-day ICC (ICC-BD), variance estimates from model 1 were used.

To measure real change within the participant, SEM, SEM%, and SDC estimates were calculated for various scenarios. From model 2, within-day SEM was calculated for each parameter using all within-participant sources of variance as follows:

$$SEM = \sqrt{\frac{\sigma_{scans}^2}{n} + \sigma_{residual}^2} \quad (3)$$

where  $n$  represented the number of follow-up scans. Within-day relative SEM (SEM%) was defined as follows:

$$SEM\% = \left| \frac{SEM}{mean} \times 100 \right| \quad (4)$$

The SDC for an individual, which is the 95% confidence interval of the change in parameter value [2], was calculated as follows:

$$SDC = 1.96 \times \sqrt{2} \times SEM \quad (5)$$

Using repositioning scans, within-day SEM% and SDC was calculated for each follow-up scan as follows:

$$SDC_n = 1.96 \times \sqrt{2} \times \sqrt{\frac{\sigma_{scans}^2}{n} + \sigma_{residual}^2} \quad (6)$$

where  $n$  represented the number of scans.

An additional set of random effects models (model 3) were built using data from the first scan from each day and all 6 repositioning scans. In this case, variance estimates were calculated as follows:

$$\sigma_{total}^2 = \sigma_{participants}^2 + \sigma_{days}^2 + \sigma_{scans}^2 + \sigma_{residual}^2 \quad (7)$$

Between-day SEM, SEM%, and SDC were calculated for this model as follows:

$$SEM_n = \sqrt{\frac{\sigma_{days}^2}{m} + \frac{\sigma_{scans}^2}{n} + \sigma_{residual}^2} \quad (8)$$

$$SDC_n = 1.96 \times \sqrt{2} \times \sqrt{\frac{\sigma_{days}^2}{m} + \frac{\sigma_{scans}^2}{n} + \sigma_{residual}^2} \quad (9)$$

where  $m$  represented the number of days and  $n$  represented the number of scans in a day.

Abbreviations: ICC, intraclass correlation coefficient; SDC, smallest detectable change; SEM, standard error of measurement.

**Supplementary Material 2.** Within-day and between day variance estimates for each spine shape parameter

| Spine Shape Parameter                 | Within-Day Variance <sup>1</sup> |        |          | Between-Day Variance <sup>2</sup> |        |        |          |
|---------------------------------------|----------------------------------|--------|----------|-----------------------------------|--------|--------|----------|
|                                       | Patient                          | Scan   | Residual | Patient                           | Day    | Scan   | Residual |
| Distance Measurements                 |                                  |        |          |                                   |        |        |          |
| Trunk length VP-DM, mm                | 1147.000                         | 7.488  | 2.093    | 1115.550                          | 17.491 | 7.301  | 2.425    |
| Trunk length VP-SP, mm                | 1140.920                         | 37.491 | 6.377    | 1115.870                          | 13.186 | 33.776 | 7.204    |
| Trunk length VP-SP, %                 | 2.588                            | 1.534  | 0.213    | 2.373                             | 0.000  | 1.145  | 0.227    |
| Dimple distance DL-DR, mm             | 123.410                          | 9.503  | 5.463    | 110.450                           | 2.413  | 8.565  | 4.326    |
| Dimple distance DL-DR, %              | 8.758                            | 0.431  | 0.272    | 8.489                             | 0.163  | 0.389  | 0.214    |
| Trunk and Pelvis Imbalances           |                                  |        |          |                                   |        |        |          |
| Sagittal imbalance VP-DM, °           | 4.767                            | 0.368  | 0.058    | 4.609                             | 0.160  | 0.364  | 0.059    |
| Sagittal imbalance VP-DM, mm          | 310.450                          | 25.252 | 3.861    | 300.560                           | 11.517 | 24.876 | 4.002    |
| Coronal imbalance VP-DM, °            | 0.440                            | 0.151  | 0.063    | 0.374                             | 0.052  | 0.152  | 0.069    |
| Coronal imbalance VP-DM, mm           | 32.516                           | 10.574 | 4.245    | 26.971                            | 3.940  | 10.670 | 4.598    |
| Pelvic obliquity, °                   | 9.404                            | 1.359  | 0.658    | 8.862                             | 0.657  | 1.385  | 0.755    |
| Pelvic obliquity, mm                  | 28.808                           | 3.885  | 1.673    | 27.398                            | 1.546  | 3.960  | 1.960    |
| Pelvic torsion DL-DR, °               | 5.049                            | 1.865  | 0.531    | 3.603                             | 0.538  | 1.698  | 0.602    |
| Pelvic inclination (dimples), °       | 36.033                           | 2.144  | 0.977    | 29.853                            | 2.774  | 2.088  | 0.931    |
| Pelvis rotation, °                    | 4.289                            | 2.458  | 0.342    | 4.085                             | 0.000  | 2.317  | 0.277    |
| Location of Postural Reference Points |                                  |        |          |                                   |        |        |          |
| Inflection point ICT, mm              | 88.583                           | 10.809 | 6.189    | 89.953                            | 3.433  | 10.623 | 6.468    |
| Kyphotic apex KA, mm                  | 543.220                          | 22.377 | 7.335    | 522.890                           | 31.716 | 22.874 | 8.651    |
| Inflection point ITL, mm              | 938.210                          | 47.489 | 33.992   | 970.310                           | 23.700 | 47.634 | 32.595   |
| Lordotic apex LA, mm                  | 1095.230                         | 30.070 | 9.609    | 1010.170                          | 20.710 | 29.315 | 9.469    |
| Inflection point ILS, mm              | 1826.400                         | 35.553 | 19.769   | 1756.840                          | 31.222 | 33.140 | 18.749   |
| Flèche cervicale, mm                  | 281.780                          | 13.305 | 1.483    | 249.870                           | 17.883 | 12.927 | 3.339    |
| Flèche lombaire, mm                   | 161.450                          | 6.888  | 1.182    | 146.840                           | 8.296  | 6.696  | 3.429    |
| Flèche cervicale (VP), mm             | 175.280                          | 11.946 | 1.857    | 151.280                           | 14.849 | 11.758 | 3.818    |
| Spinal Curve Angles                   |                                  |        |          |                                   |        |        |          |
| Kyphotic angle ICT-ITL (max), °       | 79.892                           | 2.836  | 0.851    | 73.320                            | 2.663  | 2.703  | 1.147    |

|                                        |        |        |       |        |       |        |       |
|----------------------------------------|--------|--------|-------|--------|-------|--------|-------|
| Kyphotic angle VP-ITL, °               | 70.403 | 2.635  | 0.815 | 64.953 | 3.412 | 2.563  | 1.052 |
| Kyphotic angle VP-T12, °               | 62.396 | 2.055  | 0.643 | 58.376 | 2.853 | 2.014  | 0.658 |
| Lordotic angle ITL-ILS (max), °        | 60.066 | 4.577  | 1.565 | 60.371 | 5.439 | 4.381  | 1.810 |
| Lordotic angle ITL-DM, °               | 68.231 | 3.192  | 1.103 | 67.014 | 4.296 | 3.092  | 1.518 |
| Lordotic angle T12-DM, °               | 68.953 | 3.394  | 1.137 | 66.592 | 4.389 | 3.335  | 1.165 |
| Pelvic inclination (symm.line), °      | 61.283 | 1.459  | 0.712 | 50.415 | 3.739 | 1.450  | 0.694 |
| Spinal Deviation                       |        |        |       |        |       |        |       |
| Vertebral rotation (rms), °            | 0.995  | 0.689  | 0.360 | 0.844  | 0.034 | 0.610  | 0.285 |
| Vertebral rotation (max), °            | 35.807 | 9.572  | 6.260 | 32.274 | 1.065 | 8.536  | 6.300 |
| Vertebral rotation (+max), °           | 8.653  | 2.766  | 1.653 | 6.931  | 0.519 | 2.511  | 1.455 |
| Vertebral rotation (-max), °           | 5.694  | 1.640  | 0.874 | 5.085  | 0.233 | 1.471  | 0.807 |
| Vertebral rotation (amplitude), °      | 6.849  | 1.606  | 0.952 | 6.053  | 1.004 | 1.618  | 0.866 |
| Trunk torsion, °                       | 10.064 | 2.010  | 2.873 | 8.003  | 0.861 | 1.990  | 2.743 |
| Apical deviation VP-DM (rms), mm       | 5.930  | 1.093  | 0.526 | 5.440  | 0.303 | 1.061  | 0.526 |
| Apical deviation VP-DM (max), mm       | 73.452 | 10.923 | 5.159 | 68.789 | 6.133 | 10.696 | 6.075 |
| Apical deviation VP-DM (+max), mm      | 24.254 | 2.841  | 1.587 | 22.856 | 1.280 | 2.632  | 1.549 |
| Apical deviation VP-DM (-max), mm      | 7.970  | 2.243  | 1.002 | 8.239  | 1.236 | 2.241  | 1.431 |
| Apical deviation VP-DM (amplitude), mm | 16.204 | 3.858  | 1.765 | 17.168 | 1.198 | 3.795  | 2.231 |

---

<sup>1</sup>Within-day SEM, SEM%, and SDC were calculated using repositioning data collected on day 5.

<sup>2</sup>Between-day SEM, SEM%, and SDC were calculated using the first scan from each of the first 4 days and the 6 repositioning scans collected on day 5.

Abbreviations: DL, sacral dimple left; DM, middle point between DL and DR; DR, sacral dimple right; ICT, cervicothoracic transition point; ILS, lumbosacral transition point; ITL, thoracolumbar transition point; KA, kyphotic angle; LA, lordotic angle; rms, root mean square; SP, sacral point; VP, vertebral prominens.
